# Supplementary material for: Methylglyoxal, a glycolysis metabolite, triggers metastasis through MEK/ERK/SMAD1 pathway activation in breast cancer
Source: Breast Cancer Res. 2019 Jan 23;21:11. doi: 10.1186/s13058-018-1095-7 (PMC6343302; doi:10.1186/s13058-018-1095-7)
Supplement: Supplementary file 2 — Figure S1. RNA sequencing analysis of GLO1-depleted MDA-MB-231 cells. (A) MG extracellular concentrations were assessed over 48 h in conditioned medium of GLO1-depleted MDA-MB-231 cells using UPLC-MS/MS. (B) Volcano plots highlighting differentially expressed genes in shGLO1#1 and shGLO1#2 MDA-MB-231 cells. Orange and red dots represent genes differentially expressed significantly (q < 0.05 and log2 fold change (FC) > 1) for shGLO1 clones. Red dots represent genes of the pro-metastatic signature. (C) Tenascin C, Lumican and CD24 mRNA levels were assessed by qRT-PCR in MDA-MB-231 cells treated with MG 300 and 500 μM for 1 h. Data were analyzed using one-way ANOVA followed by Dunnett post-hoc test and shown as mean values ± SEM of three independent experiments. *p < 0.05, **p < 0.01 and ***p < 0.001. Figure S2. Dicarbonyl stress promotes anchorage-independent growth and invasion of breast cancer cells. Representative pictures of the colonies formed in a soft agar matrix by GLO1-silenced MDA-MB-231 cells treated with carnosine. Figure S3. Dicarbonyl stress promotes invasion of breast cancer cells. (A) Migration ability toward serum of GLO1-overexpressing shNT and shGLO1#1 MDA-MB-231 cells was assessed using Transwell filters. Representative filters are shown for each condition. (B) Quantification of migration assays of MDA-MB-231 shGLO1 cells upon GLO1 overexpression. (C) GLO1 protein level was assessed using immunoblot in GLO1-silenced MDA-MB-231 upon GLO1 overexpression. β-actin protein is used as loading control. Western blot is representative of three independent experiments. (D) Invasiveness ability of GLO1-depleted MDA-MB-231 toward serum was assessed using Transwell filters. Where indicated, cells were pre-treated with MG scavengers, carnosine and aminoguanidine, 24 h prior to the assay. Representative filters are shown for each condition. Scale bar represents 400 μm. (E) Quantification of invasiveness ability of GLO1-silenced MDA-MB-231 cells treated with carno [file 13058_2018_1095_MOESM2_ESM.pdf]

Supplementary Figure S1

A.

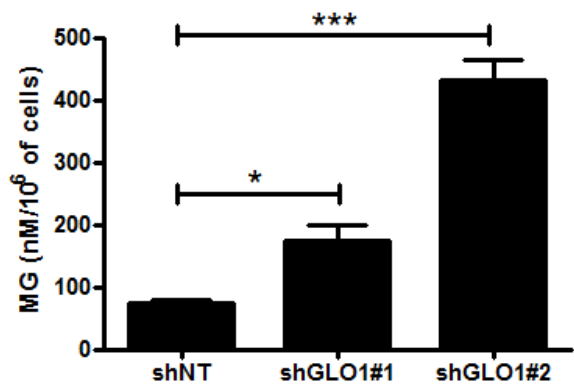

B.

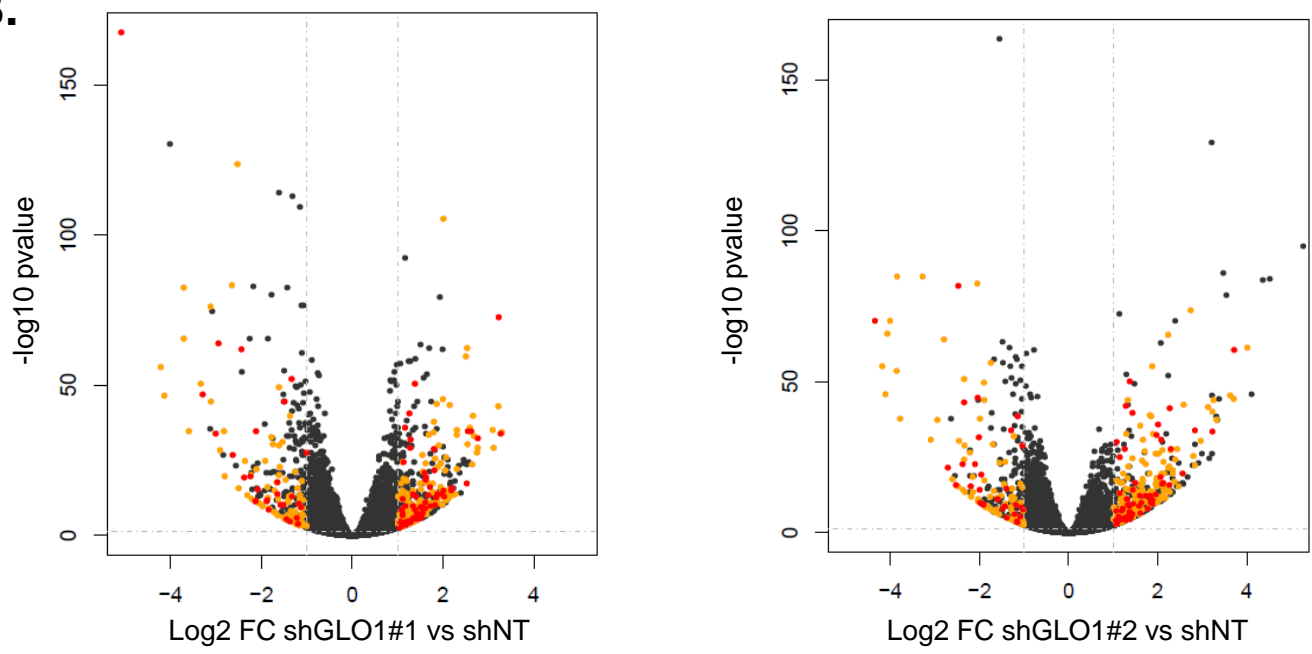

C.

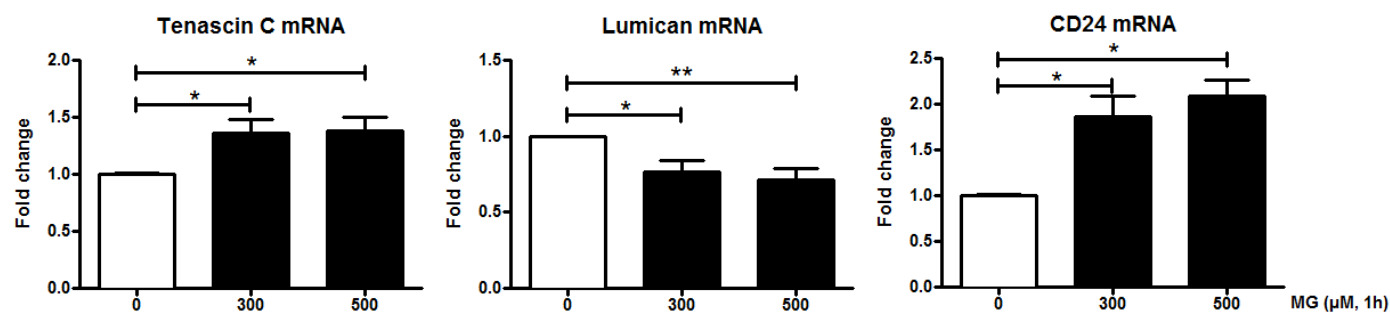

**Supplementary Figure S1. RNA sequencing analysis of GLO1-depleted MDA-MB-231 cells.** **A.** MG extracellular concentrations were assessed in forty-eight hours conditioned medium of GLO1-depleted MDA-MB-231 cells using UPLC-MS/MS. **B.** Volcano plots highlighting differentially expressed genes in shGLO1#1 and shGLO1#2 MDA-MB-231 cells. Orange and red dots represent genes differentially expressed significantly ( $q < 0.05$  and  $\log_2$  fold change (FC)  $> 1$ ) for shGLO1 clones. Red dots represent genes of the pro-metastatic signature. **C.** Tenascin C, Lumican and CD24 mRNA levels were assessed by qRT-PCR in MDA-MB-231 cells treated with MG 300 and 500  $\mu$ M during 1h. Data were analyzed using one-way ANOVA followed by Dunnet post-test and shown as mean values  $\pm$  SEM of three independent experiments. \* $p < 0.05$ , \*\* $p < 0.01$  and \*\*\* $p < 0.001$ .

# Supplementary Figure S2

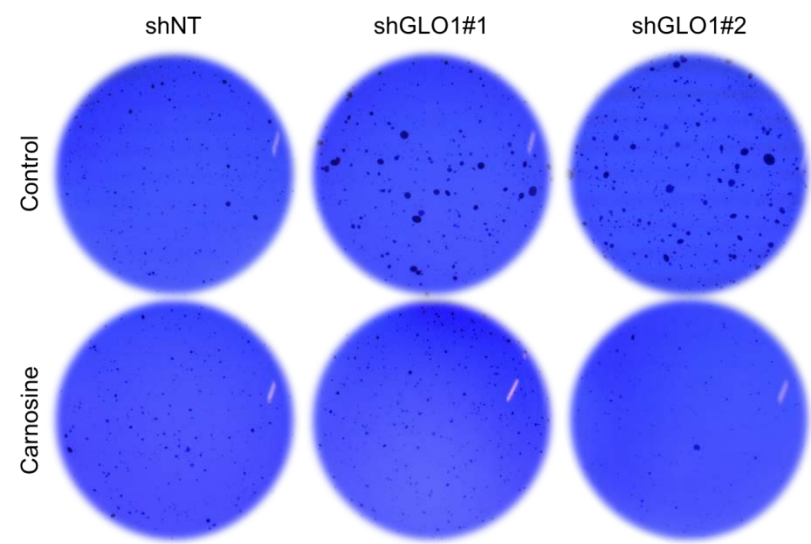

**Supplementary Figure S2. Dicarbonyl stress promotes anchorage independent growth and invasion of breast cancer cells.** Representative pictures of the colonies formed in a soft agar matrix by GLO1-silenced MDA-MB-231 cells treated with carnosine.

Supplementary Figure S3

A.

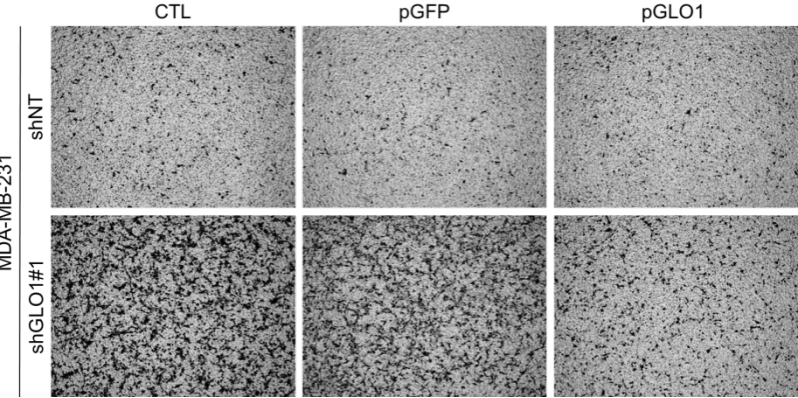

B.

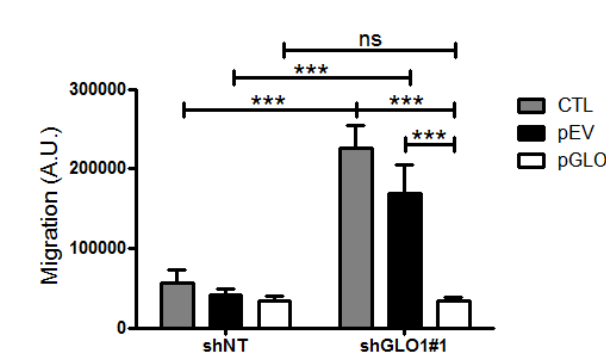

C.

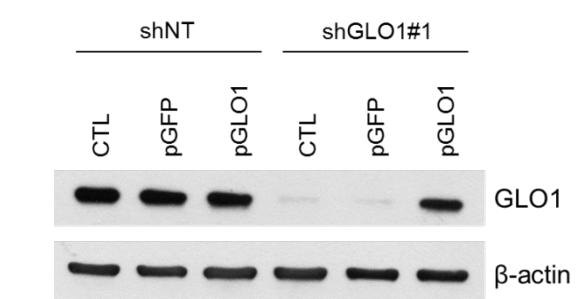

D.

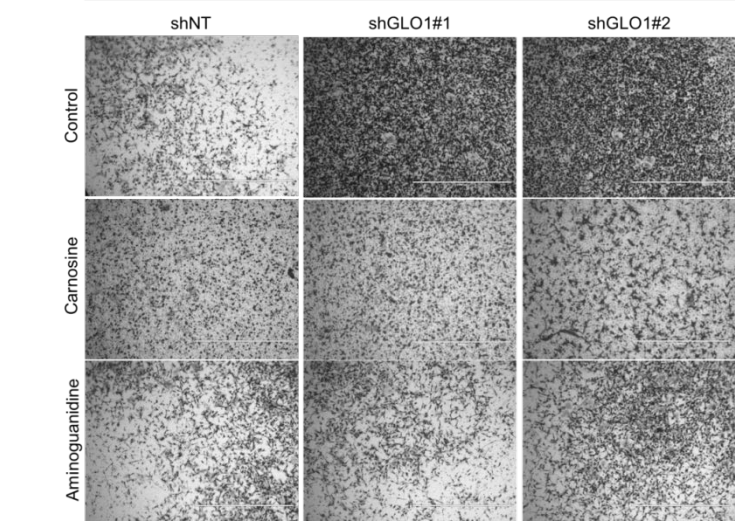

E.

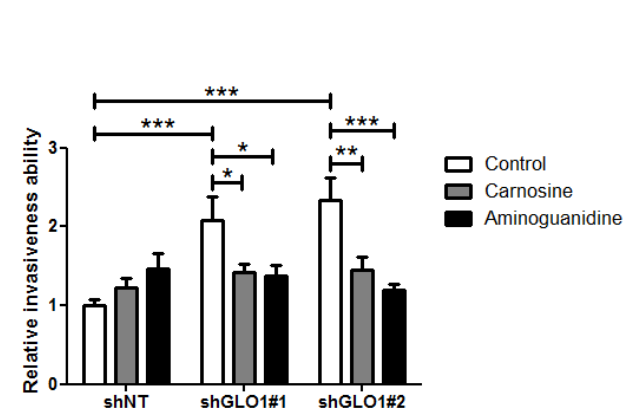

**Supplementary Figure S3. Dicarbonyl stress promotes invasion of breast cancer cells.** **A.** Migration ability toward serum of GLO1-overexpressing shNT and shGLO1#1 MDA-MB-231 cells was assessed using transwell filters. Representative filters are shown for each condition. **B.** Quantification of migration assays of MDA-MB-231 shGLO1 cells upon GLO1 overexpression. **C.** GLO1 protein level was assessed using immunoblot in GLO1-silenced MDA-MB-231 upon GLO1 overexpression.  $\beta$ -actin protein is used as loading control. Western blot is representative of 3 independent experiments. **D.** Invasiveness ability of GLO1-depleted MDA-MB-231 toward serum was assessed using transwell filters. Where indicated, cells were pre-treated with MG scavengers, carnosine and aminoguanidine, 24 hr prior the assay. Representative filters are shown for each condition. Scale bar represents 400  $\mu$ m. **E.** Quantification of invasiveness ability of GLO1-silenced MDA-MB-231 cells treated with carnosine and aminoguanidine. Data were analyzed using two-way ANOVA followed by Bonferroni post-test and shown as mean values  $\pm$  SEM of three independent experiments. ns = not significant, \* $p < 0.05$ , \*\* $p < 0.01$  and \*\*\* $p < 0.001$ .

# Supplementary Figure S4

A.

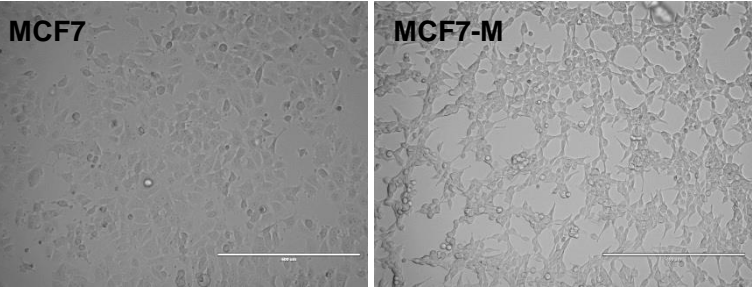

B.

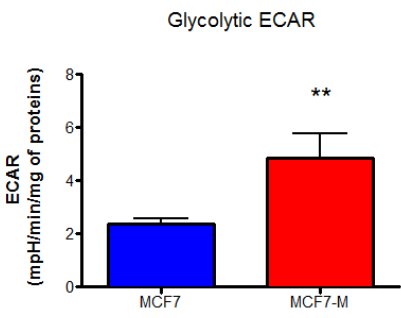

**Supplementary Figure S4. Highly migratory MCF7 cells (MCF7-M) display enhanced aerobic glycolysis.** **A.** Representative pictures of cultured MCF7 and MCF7-M cells. Scale bar represents 400 μm. **B.** Extracellular acidification rates (ECAR) in MCF7 and MCF7-M cells using Seahorse flux analyzer. Glycolytic related-ECAR was calculated. Data were analyzed using student's t test and shown as mean values ± SEM of two independent experiments. \*\*p<0.01.

Supplementary Figure S5

A.

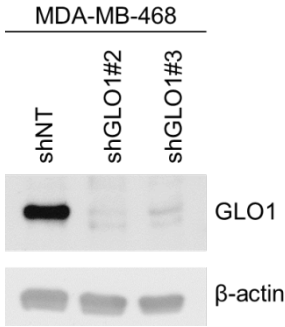

B.

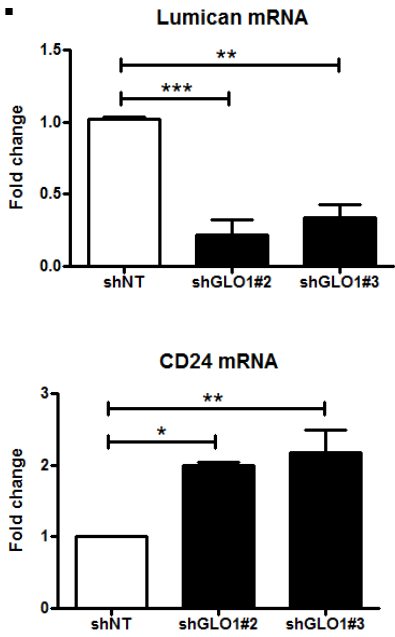

C.

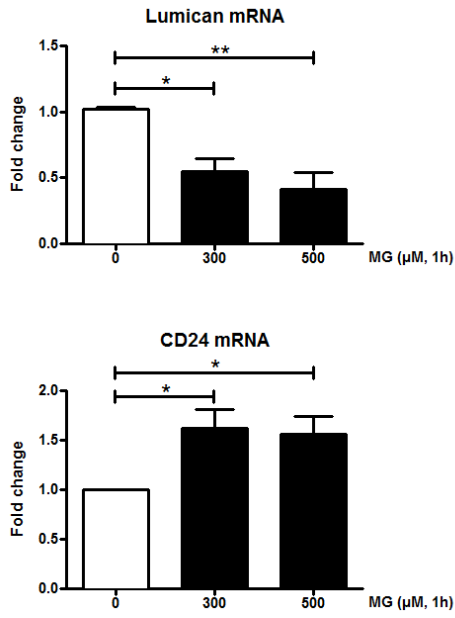

D.

MDA-MB-468

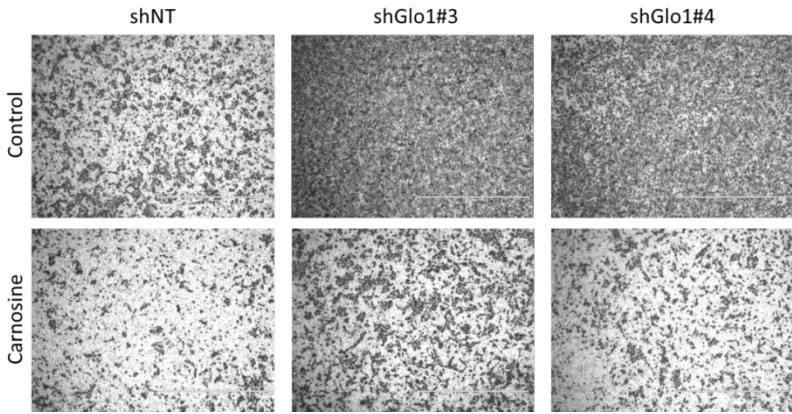

E.

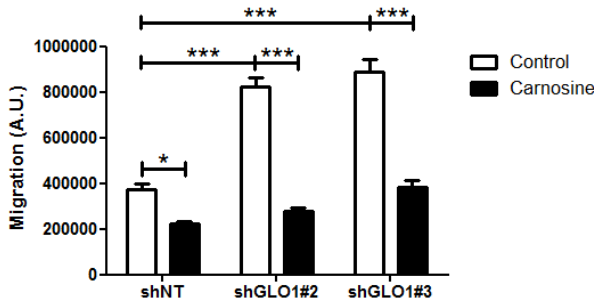

F.

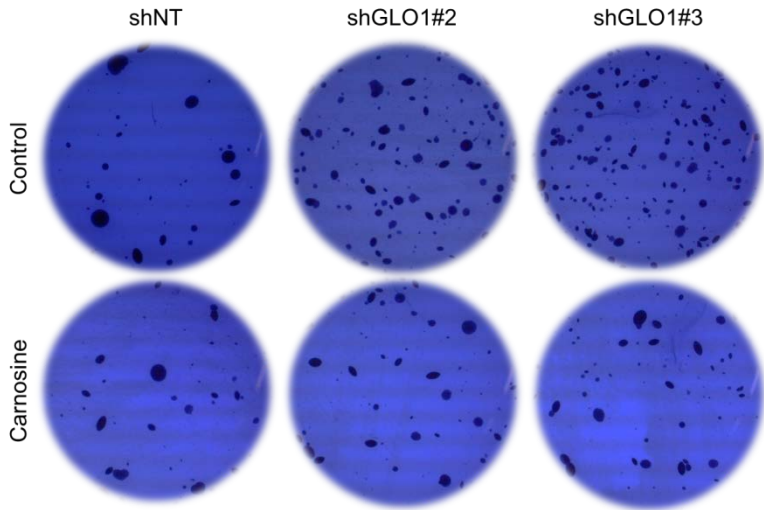

G.

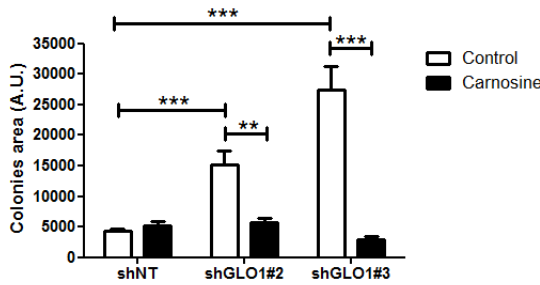

**Supplementary Figure S5. Dicarbonyl stress promotes migration and anchorage independent growth of MDA-MB-468 breast cancer cells.** **A.** GLO1 protein level in MDA-MB-468 shNT control and shGLO1#2 and #3 cells.  $\beta$ -actin protein is used as loading control. Western blot is representative of 3 independent experiments. **B.** Lumican and CD24 mRNA levels were assessed by qRT-PCR in GLO1-depleted MDA-MB-468 cells. **C.** Lumican and CD24 mRNA levels were assessed by qRT-PCR in MDA-MB-468 cells treated with MG 300 and 500  $\mu$ M during 1h. Data were analyzed using one-way ANOVA followed by Dunnet post-test and shown as mean values  $\pm$  SEM of three independent experiments. \* $p < 0.05$ , \*\* $p < 0.01$  and \*\*\* $p < 0.001$ . **D.** Migration ability of GLO1-depleted MDA-MB-468 toward serum was assessed using transwell filters. Where indicated, cells were pre-treated with carnosine 24 hr prior the assay. Representative filters are shown for each condition. Scale bar represents 400  $\mu$ m. **E.** Quantification of migratory ability of GLO1-silenced MDA-MB-468 cells treated with carnosine. Data were analyzed using two-way ANOVA followed by Bonferroni post-test and shown as mean values  $\pm$  SEM of three independent experiments. **F.** Representative pictures of the colonies formed in a soft agar matrix by GLO1-silenced MDA-MB-468 cells treated with carnosine. **G.** Quantification of colonies formed in a soft agar matrix by GLO1-silenced MDA-MB-468 cells treated with carnosine. Data were analyzed using two-way ANOVA followed by Bonferroni post-test and shown as mean values  $\pm$  SEM of three independent experiments. \* $p < 0.05$ , \*\* $p < 0.01$  and \*\*\* $p < 0.001$ .

# Supplementary Figure S6

A.

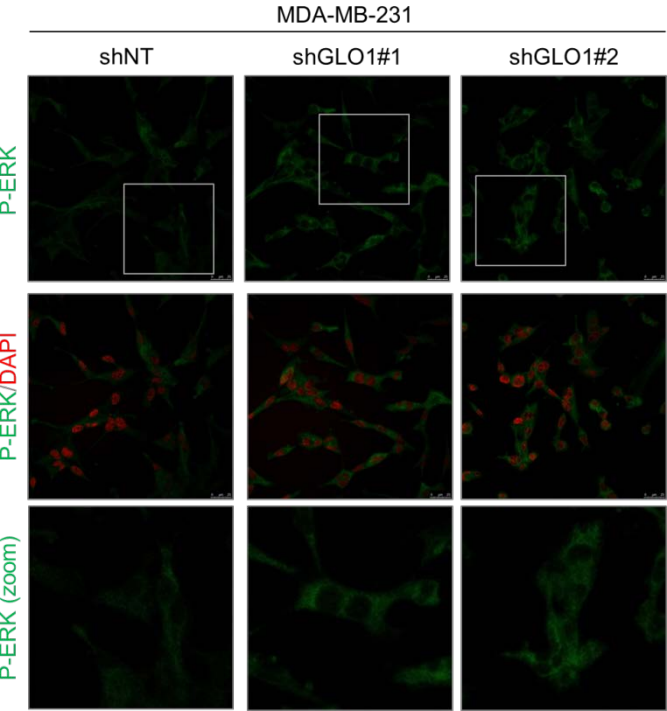

B.

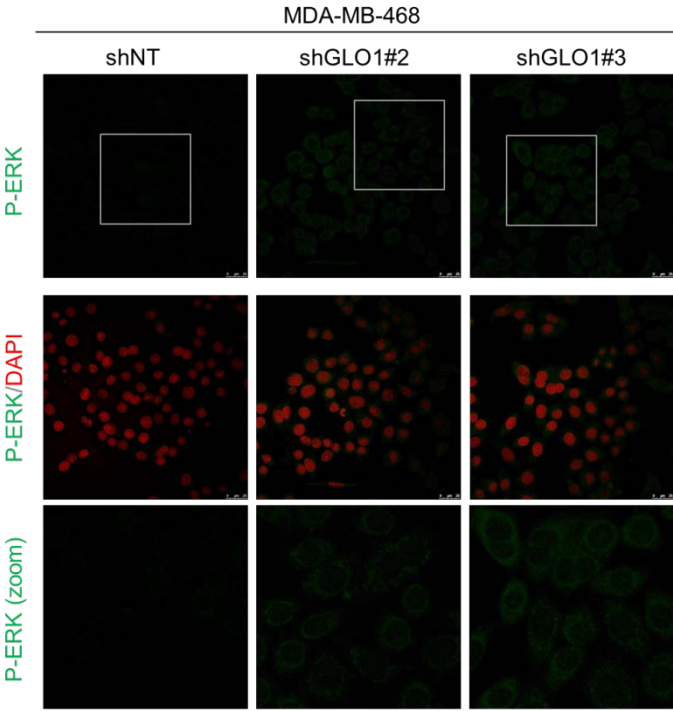

**Supplementary Figure S6. P-ERK localization in GLO1-depleted breast cancer cells.** P-ERK immunofluorescence staining in GLO1-silenced MDA-MB-231 (A.) and MDA-MB-468 (B.) cells cultured in serum free condition. Data are representative of three independent experiments. Magnification 630x. Zoomed pictures (white square) are shown where indicated.

Supplementary Figure S7

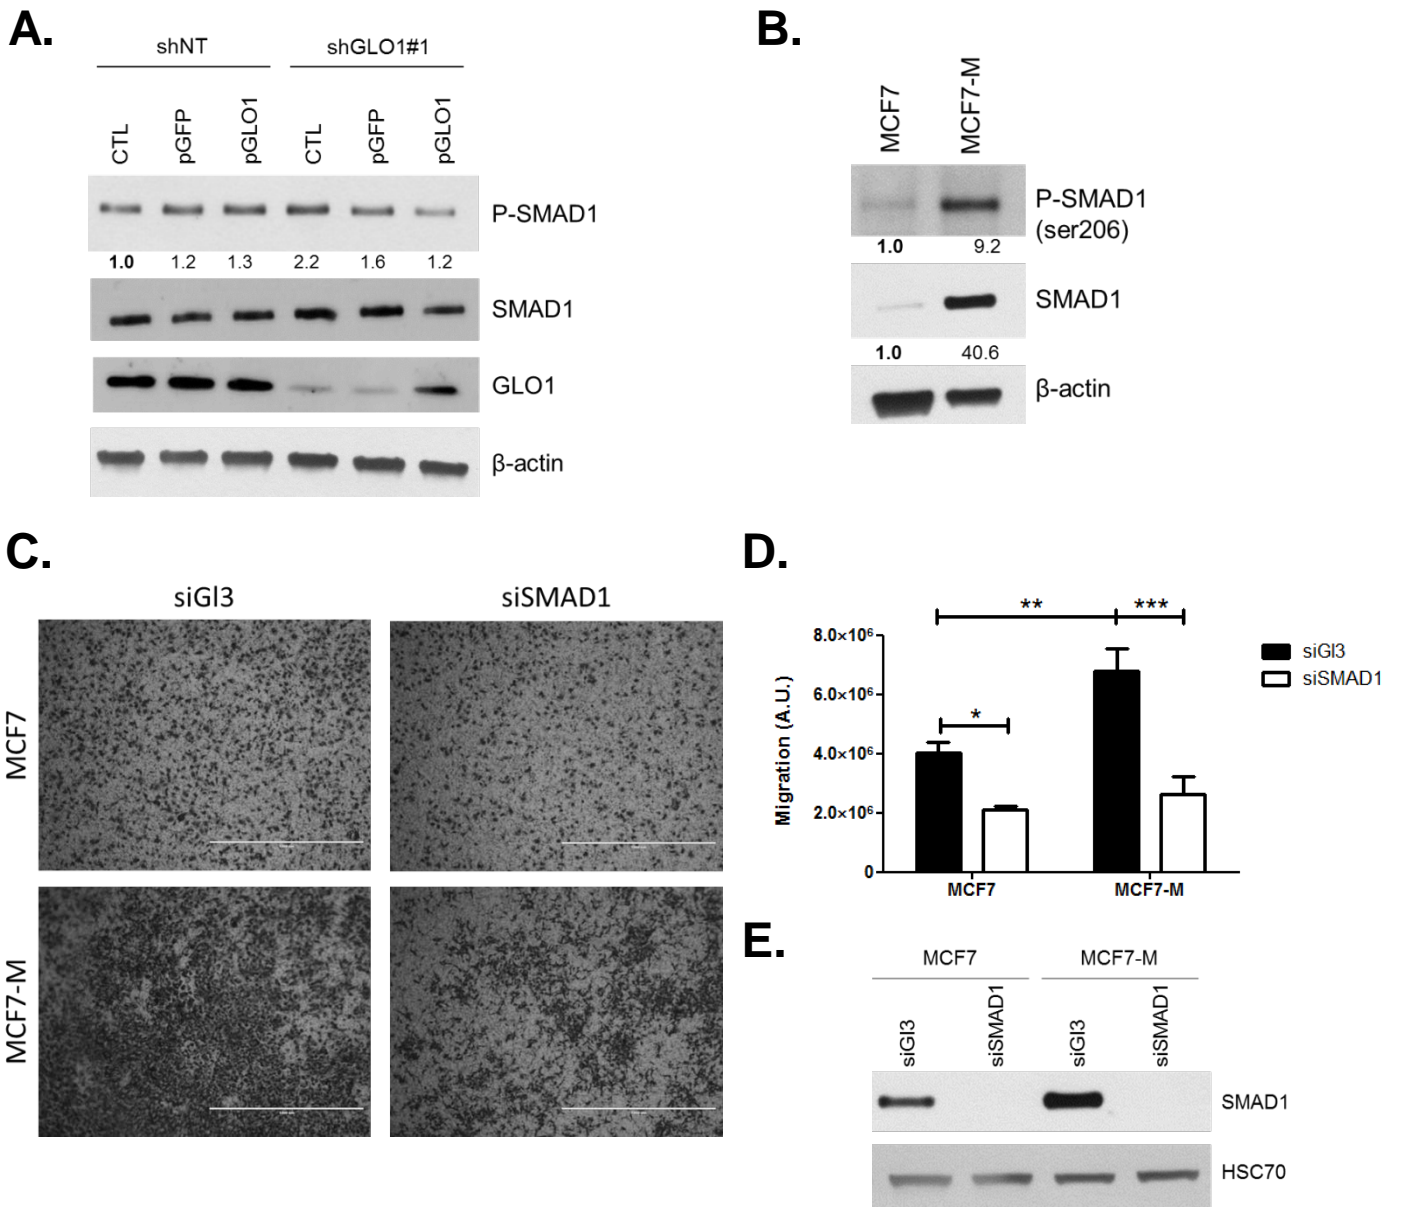

**Supplementary Figure S7. GLO1 rescue impairs increased SMAD1 phosphorylation in GLO1-depleted MDA-MB-231 cells and SMAD1 activation favors the enhanced migration ability of MCF7-M cells.** **A.** (P-)SMAD1 (ser206) protein levels were assessed using immunoblot in shNT and shGLO1#1 MDA-MB-231 cells upon GLO1 overexpression. **B.** P-SMAD1 (ser206) and SMAD1 protein level in MCF7 and MCF7-M cells cultured in serum free condition. **C.** Migration ability toward serum of SMAD1-silenced MCF7 and MCF7-M cells was assessed using transwell filters. Representative filters are shown for each condition. Scale bar represents 400  $\mu\text{m}$ . **D.** Quantification of migration assays of SMAD1-silenced MCF7 and MCF7-M cells. **E.** SMAD1 protein level assessed by immunoblot to validate SMAD1-silencing using siRNAs in MCF7 and MCF7-M cells (related to B. and C. panels).  $\beta$ -actin or HSC70 were used as loading control. Immunoblots were quantified by densitometric analysis and normalized for  $\beta$ -actin. Numbers represent fold increase relative to the condition shown with bold number. All western blots are representative of 3 independent experiments. Data were analyzed using two-way ANOVA followed by Bonferroni post-test and shown as mean values  $\pm$  SEM of three independent experiments. \* $p < 0.05$ , \*\* $p < 0.01$  and \*\*\* $p < 0.001$ .

Supplementary Figure S8

A.

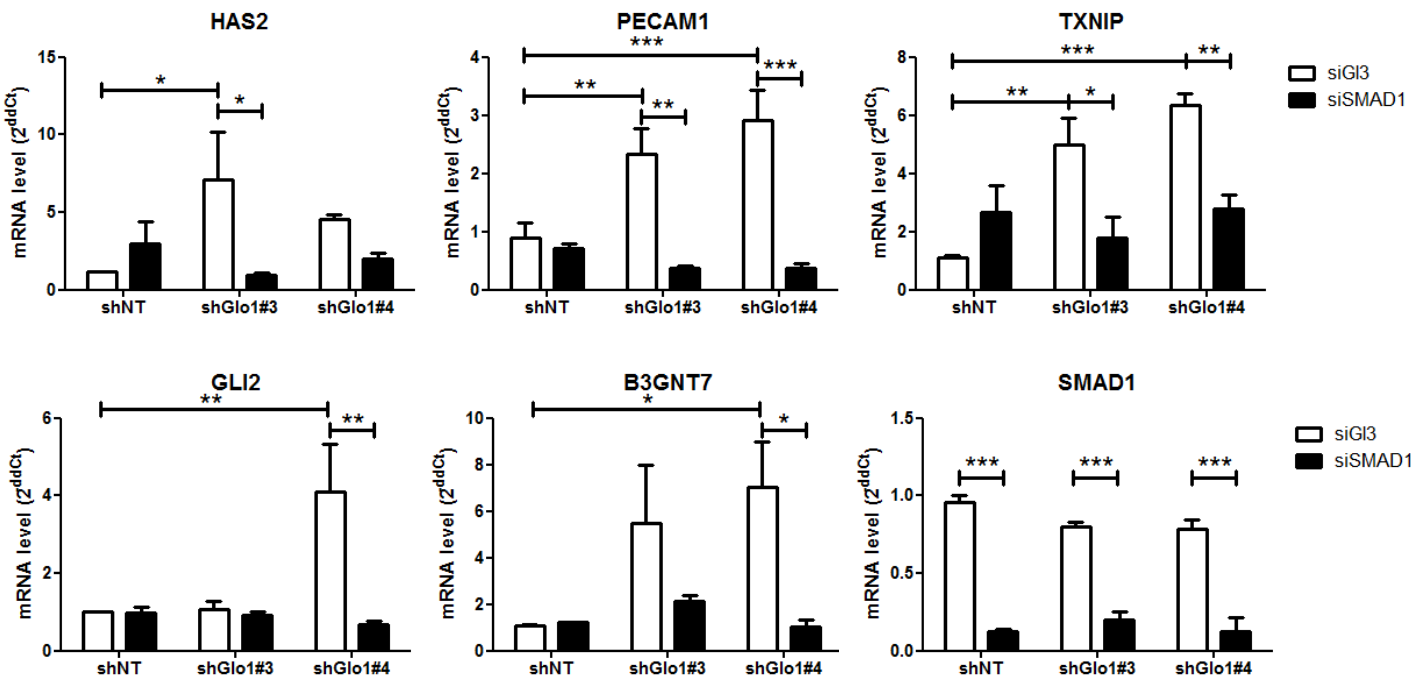

B.

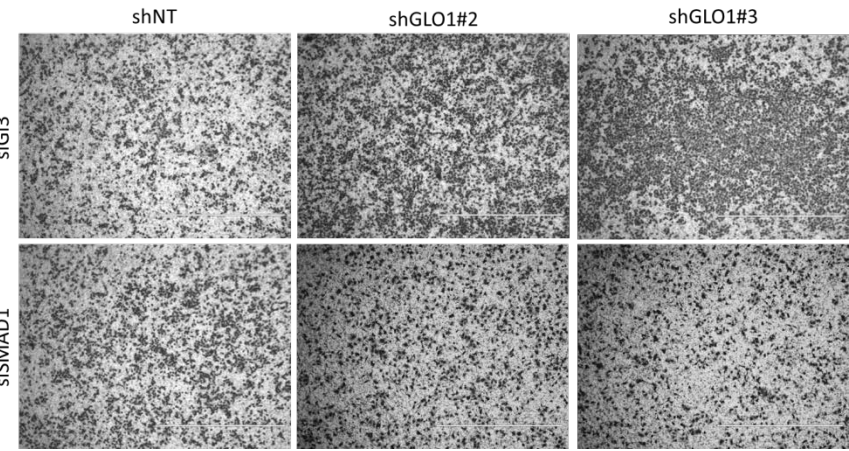

C.

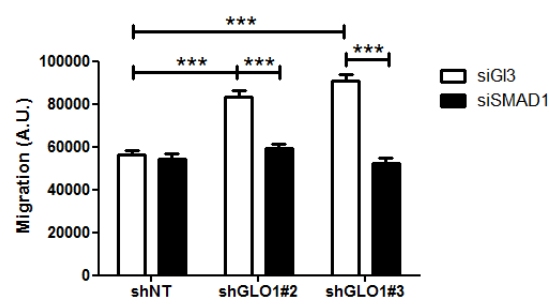

D.

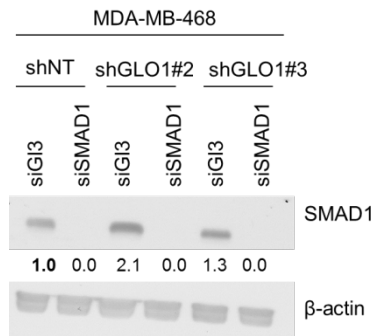

**Supplementary Figure S8. SMAD1 activation promotes the pro-metastatic phenotype in MDA-MB-468 cells.** **A.** SMAD1 target genes mRNA levels were assessed using qRT-PCR in SMAD1-silenced MDA-MB-468 shGLO1 cells. SMAD1 mRNA level was assessed to validate efficient SMAD1 siRNA silencing. **B.** Migration ability toward serum of SMAD1-silenced MDA-MB-468 shGLO1 cells was assessed using transwell filters. Representative filters are shown for each condition. Scale bar represents 400  $\mu\text{m}$ . **C.** Quantification of migration assays of SMAD1-silenced MDA-MB-468 shGLO1 cells. **D.** SMAD1 protein level assessed by immunoblot to validate SMAD1-silencing using siRNAs in GLO1-depleted MDA-MB-468 cells (related to B. and C. panels). Western blots are representative of 3 independent experiments. Data were analyzed using two-way ANOVA followed by Bonferroni post-test and shown as mean values  $\pm$  SEM of three independent experiments. \* $p < 0.05$ , \*\* $p < 0.01$  and \*\*\* $p < 0.001$ .

Supplementary Figure S9

A.

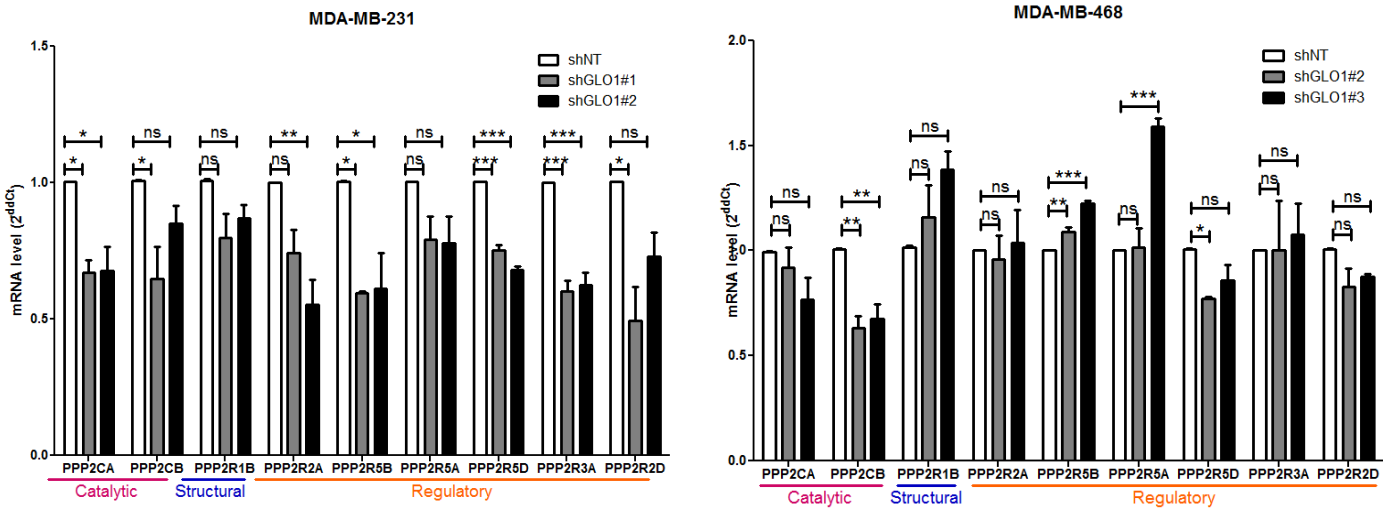

B.

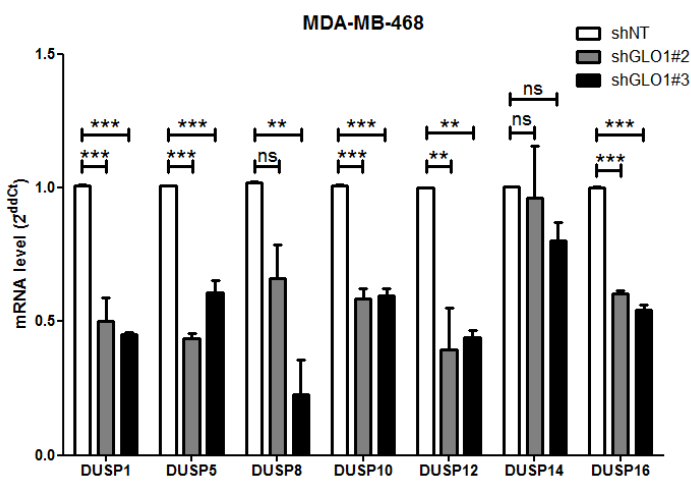

**Supplementary Figure S9. GLO1 depletion is associated with a global decrease of phosphatases expression in breast cancer cells. A.** mRNA levels of PPP2 phosphatases (from catalytic, structural and regulatory subunits) in GLO1-depleted MDA-MB-231 and MDA-MB-468 cells were assessed by qRT-PCR. **B.** DUSP1, 5, 8, 10, 12, 14 and 16 phosphatases mRNA levels in GLO1-depleted MDA-MB-468 cells were quantified by qRT-PCR. Data were analyzed using one-way ANOVA followed by Dunnet post-test and shown as mean values  $\pm$  SEM of three independent experiments. ns = not significant, \* $p < 0.05$ , \*\* $p < 0.01$  and \*\*\* $p < 0.001$ .

# Supplementary Figure S10

A.

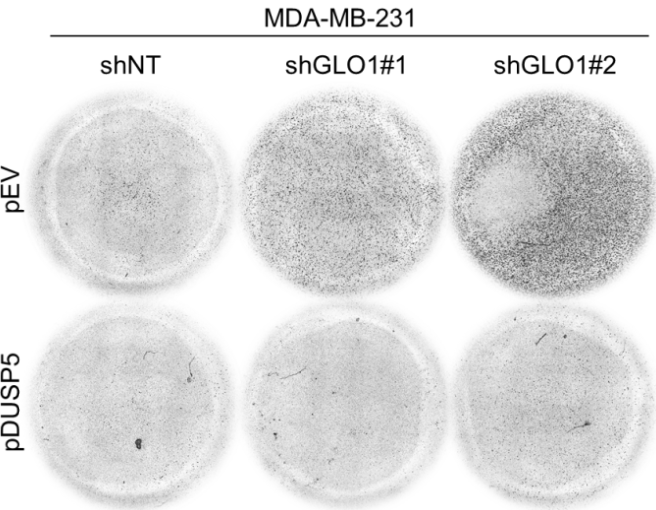

B.

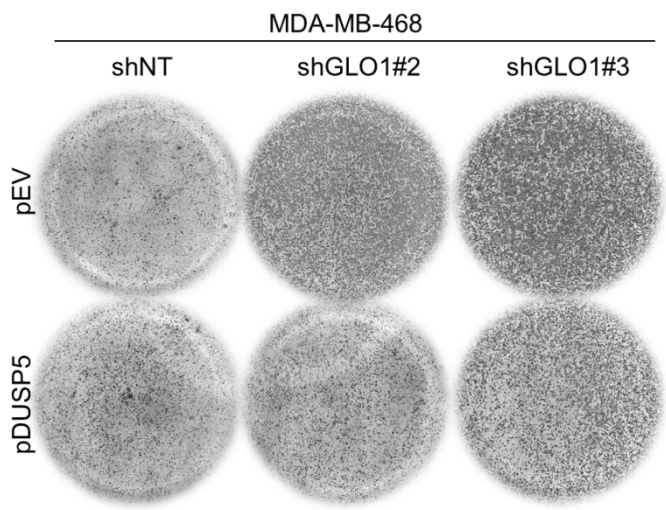

**Supplementary Figure S10. DUSP5 overexpression decreases the migratory capacity of GLO1-depleted breast cancer cells.** Migration ability toward serum of DUSP5-overexpressing MDA-MB-231 (**A**) and MDA-MB-468 (**B**) cells was assessed using transwell filters. Representative filters are shown for each condition.

**Supplementary Table S1.** Remarkable genes coding for ECM components and ECM regulators which expression is significantly modulated in GLO1-depleted MDA-MB-231 breast cancer cells. Genes shown in bold have been validated at the protein and/or mRNA expression levels. ns = not significant.

| Genes                                                  | Gene name     | shGLO1#1<br>fold change,<br>(fdr<0.001) | shGLO1#2<br>fold change,<br>(fdr<0.001) |
|--------------------------------------------------------|---------------|-----------------------------------------|-----------------------------------------|
| <i>ECM components</i>                                  |               |                                         |                                         |
| • <i>Collagens</i>                                     |               |                                         |                                         |
| <b>Collagen type IV, alpha 3 chain</b>                 | <b>COL4A3</b> | <b>- 8.00</b>                           | <b>- 5.21</b>                           |
| Collagen type IV, alpha 4 chain                        | COL4A4        | - 7.67                                  | - 5.10                                  |
| <b>Collagen type VI, alpha 1 chain</b>                 | <b>COL6A1</b> | <b>+ 4.00</b>                           | <b>+ 4.35</b>                           |
| Collagen type VI, alpha 2 chain                        | COL6A2        | + 4.53                                  | + 9.32                                  |
| <b>Collagen type VI, alpha 3 chain</b>                 | <b>COL6A3</b> | <b>+ 9.32</b>                           | <b>+ 2.09</b>                           |
| Collagen type V, alpha 1 chain                         | COL5A1        | + 2.17                                  | + 2.20                                  |
| Collagen type VII, alpha 1 chain                       | COL7A1        | + 2.41                                  | + 2.38                                  |
| • <i>Proteoglycans:</i>                                |               |                                         |                                         |
| Syndecan 1                                             | SDC1          | + 2.01                                  | ns                                      |
| Syndecan 2                                             | SDC2          | ns                                      | + 2.66                                  |
| <b>Tenascin C</b>                                      | <b>TNC</b>    | <b>+ 2.41</b>                           | <b>+ 2.43</b>                           |
| <b>Lumican</b>                                         | <b>LUM</b>    | <b>- 3.68</b>                           | <b>- 6.50</b>                           |
| • <i>Other ECM proteins:</i>                           |               |                                         |                                         |
| Fibronectin 1                                          | FN1           | + 2.57                                  | + 1.45                                  |
| Laminin subunit alpha 4                                | LAMA4         | + 2.43                                  | + 2.69                                  |
| <b>Transforming growth factor-beta-induced protein</b> | <b>TGFB1</b>  | <b>+ 2.58</b>                           | <b>+ 2.10</b>                           |
| Matrilin 2                                             | MATN2         | - 4.53                                  | - 1.66                                  |
| Pleiotrophin                                           | PTN           | + 6.11                                  | + 3.01                                  |
| <i>ECM receptors</i>                                   |               |                                         |                                         |
| • <i>Integrins:</i>                                    |               |                                         |                                         |
| Integrin beta 2                                        | ITGB2         | - 3.14                                  | - 2.27                                  |
| Integrin beta 8                                        | ITGB8         | + 3.03                                  | + 4.14                                  |
| • <i>Non-integrins:</i>                                |               |                                         |                                         |
| Ephrin B1                                              | EPHB1         | - 2.58                                  | - 2.62                                  |
| Ephrin B3                                              | EPHB3         | + 2.45                                  | + 3.68                                  |
| Plexin A4                                              | PLXNA4        | + 3.92                                  | + 3.48                                  |
| C-X-C chemokine receptor type 4                        | CXCR4         | - 33.82                                 | - 5.54                                  |
| <b>CD24 molecule</b>                                   | <b>CD24</b>   | <b>+ 5.82</b>                           | <b>+ 4.89</b>                           |
| <i>Cell-cell adhesion</i>                              |               |                                         |                                         |
| Melanoma cell adhesion molecule                        | MCAM          | - 2.22                                  | - 1.69                                  |
| Intercellular adhesion molecule 1                      | ICAM1         | - 2.00                                  | - 2.04                                  |
| <b>Platelet endothelial cell adhesion molecule</b>     | <b>PECAM1</b> | <b>+ 2.16</b>                           | <b>+ 2.48</b>                           |
| E cadherin                                             | CDH1          | - 9.78                                  | - 20.25                                 |
| N cadherin                                             | CDH2          | - 3.68                                  | - 4.59                                  |
| Adhesion G protein-coupled receptor G1                 | ADGRG1        | + 2.23                                  | + 2.57                                  |
| Adhesion G protein-coupled receptor G2                 | ADGRG2        | + 2.62                                  | + 2.22                                  |
| <i>MMPs and other modulators of ECM</i>                |               |                                         |                                         |
| Matrix metallopeptidase 15                             | MMP15         | -2.58                                   | ns                                      |
| Matrix metallopeptidase 24                             | MMP24         | - 2.33                                  | - 2.79                                  |
| ADAM metallopeptidase domain 12                        | ADAM12        | ns                                      | + 2.03                                  |
| Hyaluronan synthase 2                                  | HAS2          | + 2.51                                  | + 4.79                                  |
| Rho GTPase J                                           | RHOJ          | + 5.98                                  | + 4.82                                  |

**Supplementary Table S2. DUSPs and PPPs subunits expression data from RNASeq in GLO1-depleted MDA-MB-231 cells.** Fold change and false discovery rate (FDR) are shown for both shGLO1 clones. ns = not significant.

| Gene    | Name                                                                        | shGlo1#1    |         | shGlo1#2    |         |
|---------|-----------------------------------------------------------------------------|-------------|---------|-------------|---------|
|         |                                                                             | Fold change | FDR     | Fold change | FDR     |
| DUSP1   | Dual specificity protein phosphatase 1                                      | -2,83       | < 0.001 | ns          |         |
| DUSP5   | Dual specificity protein phosphatase 5                                      | -1,87       | < 0.001 | -1,45       | < 0.001 |
| DUSP8   | Dual specificity protein phosphatase 8                                      | -2,64       | < 0.001 | -2,14       | < 0.001 |
| DUSP10  | Dual specificity protein phosphatase 10                                     | -2,64       | < 0.001 | -1,53       | < 0.001 |
| DUSP12  | Dual specificity protein phosphatase 12                                     | -1,3        | < 0.001 | ns          |         |
| DUSP14  | Dual specificity protein phosphatase 14                                     | -1,68       | < 0.001 | ns          |         |
| DUSP16  | Dual specificity protein phosphatase 16                                     | -1,25       | 0.046   | -1,55       | < 0.001 |
| PPP2CA  | Serine/threonine-protein phosphatase 2A catalytic subunit alpha isoform     | -1,19       | < 0.001 | ns          |         |
| PPP2R1B | Protein phosphatase 2 scaffold subunit A beta                               | -1,17       | 0.034   | ns          |         |
| PPP2R2A | Serine/threonine-protein phosphatase 2A regulatory subunit B alpha isoform  | ns          |         | ns          |         |
| PPP2R5B | Serine/threonine-protein phosphatase 2A regulatory subunit beta isoform     | ns          |         | -1,29       | 0.042   |
| PPP2R5A | Serine/threonine-protein phosphatase 2A regulatory subunit alpha isoform    | ns          |         | -1,18       | 0.035   |
| PPP2R5D | Serine/threonine-protein phosphatase 2A regulatory subunit delta isoform    | ns          |         | -1,37       | < 0.001 |
| PPP2R3A | Serine/threonine-protein phosphatase 2A regulatory subunit B' subunit alpha | ns          |         | -1,23       | 0.004   |
| PPP2R2D | Serine/threonine-protein phosphatase 2A regulatory subunit B delta isoform  | -1,48       | < 0.001 | -1,41       | < 0.001 |
| PPP2CB  | Serine/threonine-protein phosphatase 2A catalytic subunit beta isoform      | -1,18       | < 0.001 | -1,33       | < 0.001 |

Supplementary Table S3. Primer sequences and probes used for quantitative reverse transcription-PCR (qRT-PCR).

| Name       | Fw/Rv | Sequence                        | Probe (UPL, Roche) |
|------------|-------|---------------------------------|--------------------|
| Tenascin C | Fw    | 5'-CCGGACCAAAACCATCAGT-3'       | 76                 |
|            | Rv    | 5'-GGGATTAATGTCCGAAATGGT-3'     |                    |
| Lumican    | Fw    | 5'-GAAAGCAGTGTCAAGACAGTAAGG-3'  | 72                 |
|            | Rv    | 5'-GGCCACTGGTACCACCAA-3'        |                    |
| CD24       | Fw    | 5'-TGGATTTGACATTGCATTGA-3'      | 37                 |
|            | Rv    | 5'-TGGGGGTAGATTCTCATTCATC-3'    |                    |
| COL4A3     | Fw    | 5'-CTACGGACCCCAAGGAGAA-3'       | 1                  |
|            | Rv    | 5'-GGCCTGGAAGTGGTGTG-3'         |                    |
| COL4A4     | Fw    | 5'-TGGTCTCTCCAGGTCCAAA-3'       | 27                 |
|            | Rv    | 5'-CTCTTTCTCCGGGAAAACCT-3'      |                    |
| COL6A1     | Fw    | 5'-GAAGAGAAGCGCCGTTG-3'         | 80                 |
|            | Rv    | 5'-CGGTAGCCTTTAGGTCCGATA-3'     |                    |
| COL6A2     | Fw    | 5'-AGACCTTCCTGCCAAACA-3'        | 4                  |
|            | Rv    | 5'-CTTGTGGAAGTTCTGCTCACC-3'     |                    |
| COL6A3     | Fw    | 5'-TCITTTGCCTCTTCTCTCAGG-3'     | 3                  |
|            | Rv    | 5'-CTCTTGTTGTGACTTCAATGACTGC-3' |                    |
| SMAD1      | Fw    | 5'-TCAGCCGATGGACACAAAC-3'       | 82                 |
|            | Rv    | 5'-TCATAAGCAACCGCCTGAA-3'       |                    |
| SMAD5      | Fw    | 5'-AACCCCTCATTCATCTTAGCC-3'     | 50                 |
|            | Rv    | 5'-CCAACTCCCTTTGAAAAAGC-3'      |                    |
| SALL4      | Fw    | 5'-ACTGCAACCTCCCCATTCT-3'       | 2                  |
|            | Rv    | 5'-CCCAGCTACTCTGGAGGCTA-3'      |                    |
| NR5A2      | Fw    | 5'-TTTGGCATTGTTGAATTCA-3'       | 4                  |
|            | Rv    | 5'-TTGGATGATGAAAAGACTGATG-3'    |                    |
| PECAM1     | Fw    | 5'-GCTTCCCGATAAGATCTCAGG-3'     | 1                  |
|            | Rv    | 5'-TCCCAGAGGAAGGTAGGTCAT-3'     |                    |
| MAP4K4     | Fw    | 5'-CACTTGGAAGTCCTTCAGCA-3'      | 1                  |
|            | Rv    | 5'-GCCTCCTATGGTCATGCAGT-3'      |                    |
| GLI2       | Fw    | 5'-AAGGAGAGGGGACTGTTGG-3'       | 1                  |
|            | Rv    | 5'-ACGAGGGTCATCTGGTGGT-3'       |                    |
| B3GNT7     | Fw    | 5'-CCTGAGCCCCATGGTAT-3'         | 19                 |
|            | Rv    | 5'-TGGGGACCAAAGGCTAGG-3'        |                    |
| LEF1       | Fw    | 5'-GCGGAGCGGAGATTACAG-3'        | 10                 |
|            | Rv    | 5'-TTGAAGGGGATCATCTGTC-3'       |                    |
| TXNIP      | Fw    | 5'-GGCTAAAGTGCTTTGGATGC-3'      | 3                  |
|            | Rv    | 5'-TGTCITTCATAGCGCAGGTACTC-3'   |                    |
| HAS2       | Fw    | 5'-GCCACCAAGGAGACATATCA-3'      | 3                  |
|            | Rv    | 5'-GGCAGAATGAAAAATAACCCATA-3'   |                    |
| DUSP1      | Fw    | 5'-CGAGGCCATTGACTTCATAGA-3'     | 65                 |
|            | Rv    | 5'-CTGGCAGTGGACAAACACC-3'       |                    |
| DUSP5      | Fw    | 5'-CCTACAGGGTTTGTAGGACAT-3'     | 89                 |
|            | Rv    | 5'-TCTACACAACATTTCAGGGTTCA-3'   |                    |
| DUSP8      | Fw    | 5'-CCAGTCACTGTGGGAAGAGG-3'      | 1                  |
|            | Rv    | 5'-ACAAATAGAAGAAACAGCAGAGAGG-3' |                    |
| DUSP10     | Fw    | 5'-TCCCTCCAGCTCCAAGAGT-3'       | 10                 |
|            | Rv    | 5'-ATGGGCTGAGGTAGCAAGC-3'       |                    |
| DUSP12     | Fw    | 5'-AACCCCTCATTCATCTTAGCC-3'     | 50                 |
|            | Rv    | 5'-CCAACTCCCTTTGAAAAAGC-3'      |                    |
| DUSP14     | Fw    | 5'-GTGGCTGACAAGATCCACAG-3'      | 4                  |
|            | Rv    | 5'-GCAGCACAGTGCACCAAG-3'        |                    |
| DUSP16     | Fw    | 5'-AGCCGCACAGACCTCACTA-3'       | 8                  |
|            | Rv    | 5'-CATAACAATGCGGCTGACC-3'       |                    |
| PPP2CA     | Fw    | 5'-TTGTTGGTGTGCATTTTGTG-3'      | 4                  |
|            | Rv    | 5'-TGAAGCAGCACAGATTTCCTT-3'     |                    |
| PPP2CB     | Fw    | 5'-GGACGACAAGGCGTTCAC-3'        | 17                 |
|            | Rv    | 5'-TCAGCTGCTTACACTCGTTCA-3'     |                    |
| PPP2R1B    | Fw    | 5'-TGGATATGAAACTGTAGAGGGAGA-3'  | 2                  |
|            | Rv    | 5'-TGCAGTCACCTCAGCTGCTA-3'      |                    |
| PPP2R2A    | Fw    | 5'-GCAACAGGAGATAAAGGTGGTAG-3'   | 2                  |
|            | Rv    | 5'-TCCTCTGCTATGAGACTGGATTI-3'   |                    |
| PPP2R5B    | Fw    | 5'-CGCAAAACAGTGCAACCAC-3'       | 69                 |
|            | Rv    | 5'-ACACCATTGAAGTGCTCGAA-3'      |                    |
| PPP2R5A    | Fw    | 5'-TCTGGAATTTAGGCAAAACCTT-3'    | 80                 |
|            | Rv    | 5'-CCCAGCTTTTATTTATATTTGTGC-3'  |                    |
| PPP2R5D    | Fw    | 5'-CGCTTCAACCTCAGCAAGA-3'       | 4                  |
|            | Rv    | 5'-GGGTTGGCGAATCTTTCA-3'        |                    |
| PPP2R3A    | Fw    | 5'-ACCCAGGGTCAAGAGAGGAT-3'      | 2                  |
|            | Rv    | 5'-TTCCCACTGGCAAAACTGAT-3'      |                    |
| PPP2R2D    | Fw    | 5'-TGTGTGCAGCAATTTCTGTCC-3'     | 74                 |
|            | Rv    | 5'-CCTGGTGTATCTGATGGGCTA-3'     |                    |
| 18S        | Fw    | 5'-CTTCCACAGGAGGCCTACAC-3'      | 48                 |
|            | Rv    | 5'-CGCAAAATATGCTGGAACCTT-3'     |                    |

**Supplementary Table S4. Antibodies and dilution used for Western Blot experiments.**

| Protein targeted                              | Source                                      | Clone/Cat# | Dilution (WB) |
|-----------------------------------------------|---------------------------------------------|------------|---------------|
| Argpyrimidine                                 | Oya et al. JBC 1999                         | mAb6B      | 1/6000        |
| β-actin                                       | Sigma-Aldrich (St Louis, MO, USA)           | A5441      | 1/5000        |
| E-cadherin                                    | BD Biosciences (Franklin Lakes, NJ, USA)    | 610181     | 1/1000        |
| Collagen VI α1                                | Lifespan Biosciences (Seattle, WA, USA)     | LSB696     | 1/1000        |
| Collagen VI α3                                | Sigma-Aldrich (St Louis, MO, USA)           | SAB4500389 | 1/1000        |
| Tenascin C                                    | ThermoFischer Scientific (Waltham, MA, USA) | MA1-26779  | 1/1000        |
| TGFBR1                                        | Santa Cruz (Santa Cruz, CA, USA)            | sc-398     | 1/1000        |
| Glyoxalase 1                                  | BioMAC (Leipzig, Germany)                   | #02-14     | 1/1000        |
| SMAD4                                         | Cell Signaling (Danvers, MA, USA)           | #38454     | 1/1000        |
| P-MEK1/2                                      | Cell Signaling (Danvers, MA, USA)           | #2338      | 1/1000        |
| MEK2                                          | Cell Signaling (Danvers, MA, USA)           | #9125      | 1/1000        |
| P-ERK1/2                                      | Cell Signaling (Danvers, MA, USA)           | #9101      | 1/1000        |
| ERK1/2                                        | Cell Signaling (Danvers, MA, USA)           | #9102      | 1/1000        |
| MG-H (3D11)                                   | Cell Biolabs (San Diego, CA, USA)           | STA-011    | 1/2000        |
| Nrf2                                          | Abcam (Cambridge, UK)                       | ab62352    | 1/1000        |
| TGFBI                                         | Cell Signaling (Danvers, MA, USA)           | #5601      | 1/1000        |
| Phospho-Smad2 (Ser465/467)/Smad3 (Ser423/425) | Cell Signaling (Danvers, MA, USA)           | #8828      | 1/500         |
| SMAD2/3                                       | Cell Signaling (Danvers, MA, USA)           | #8685      | 1/1000        |
| P-SMAD1 (ser206)                              | Cell Signaling (Danvers, MA, USA)           | #5753      | 1/1000        |
| P-SMAD1/5 (ser463/465)                        | Cell Signaling (Danvers, MA, USA)           | #9516      | 1/1000        |
| SMAD1                                         | Cell Signaling (Danvers, MA, USA)           | #6944      | 1/1000        |
| Vimentin                                      | Sigma-Aldrich (St Louis, MO, USA)           | V6389      | 1/1000        |
| SMAD5                                         | Cell Signaling (Danvers, MA, USA)           | #12534     | 1/1000        |
| DUSP1                                         | Abcam (Cambridge, UK)                       | ab195261   | 1/1000        |
| DUSP5                                         | Santa Cruz (Santa Cruz, CA, USA)            | sc-393801  | 1/1000        |
| DUSP8                                         | Santa Cruz (Santa Cruz, CA, USA)            | sc-271250  | 1/1000        |
